# Supplementary material for: An anisotropically crystallized and nitrogen-doped CuWO4 photoanode for efficient and robust visible-light-driven water oxidation
Source: Royal Society of Chemistry journal article supplement (doi:10.1039/d4ta04120h), 2024-01-01
Supplement: d4ta04120h1.pdf [file d4ta04120h1.pdf]

## Supporting Information

### **An anisotropically crystallized and nitrogen-doped CuWO<sub>4</sub> photoanode for efficient and robust visible-light-driven water oxidation**

Tomohiro Katsuki, Zaki N. Zahran, Norihisa Hoshino, Yuta Tsubonouchi, Debraj Chandra, and Masayuki Yagi\*

Department of Materials Science and Technology, Faculty of Engineering, Niigata University, 8050 Ikarashi-2, Niigata 9050-2181, Japan.

\*Correspondence to: yagi@eng.niigata-u.ac.jp

#### **Contents**

**Table S1.** Summary of PEC performances of the state-of-the-art CuWO<sub>4</sub> electrodes.

**Figure S1.** Photos of precursor suspensions with different fractions of BIM.

**Figure S2.** Photos of the CuWO<sub>4</sub> on FTO.

**Figure S3.** XPS spectra in the N1s region for CuWO<sub>4</sub> films before and after a surface treatment with Ar plasma etching.

**Figure S4.** Tauc plots corresponding to the DRS spectra of CuWO<sub>4</sub> films.

**Figure S5.** Results of DFT calculation for neat-CuWO<sub>4</sub>; band diagram, plots of the calculated band gap versus  $\alpha$  values, PDOS diagram, imaginary part of the dielectric coefficients, and integrated density of states of the valence band and the conduction band.

**Table S2.** Parameters for calculation of replacement energies.

**Table S3.** Summary of transition energies estimated from the PDOS diagrams.

**Figure S6.** Imaginary part of the dielectric coefficients calculated for the N-doped structures.

**Figure S7** CVs of N-CuWO<sub>4</sub> and neat-CuWO<sub>4</sub> electrodes at different scan rates.

**Figure S8.** SEM of the N-CuWO<sub>4</sub> film before and after photoelectrolysis.

**Figure S9.** DRS of the N-CuWO<sub>4</sub> film before and after photoelectrolysis.

**Table S1.** Comparison of performances of state-of-the-art CuWO<sub>4</sub>-based photoanodes for PEC water oxidation.<sup>a)</sup>

| Sample                                | Synthesis                  | Buffer                                                        | pH   | $j_{1.23}$<br>/ mA cm <sup>-2</sup> | IPCE <sub>420</sub><br>(%) | $\eta_{\text{sep}}$<br>(%) | $\eta_{\text{cat}}$<br>(%) | FE <sub>O<sub>2</sub></sub><br>(%) | Stability:<br>Remaining<br>photocurrent (%)<br>(reaction time) | Ref.      |
|---------------------------------------|----------------------------|---------------------------------------------------------------|------|-------------------------------------|----------------------------|----------------------------|----------------------------|------------------------------------|----------------------------------------------------------------|-----------|
| N-CuWO <sub>4</sub>                   | MiMIC                      | 0.1 M KPi                                                     | 7.0  | 0.21                                | 5.6                        | 12.3 <sup>b)</sup>         | 51.9 <sup>b)</sup>         | 97 <sup>c)</sup>                   | 92 (40 h) <sup>c)</sup>                                        | This work |
| CuWO <sub>4</sub> nanoflake           | Sacrificial templates      | 1.0 M KBi                                                     | 9.5  | 0.4                                 | 8                          | 12                         | 55                         | nr                                 | 100 (5 h)                                                      | R1        |
| CuWO <sub>4</sub> nanoflake           | Sacrificial templates      | 0.1 M KPi                                                     | 7.0  | 0.3                                 | nr                         | nr                         | nr                         | nr                                 | 95 (1 h)                                                       | R2        |
| CuWO <sub>4</sub> nanoflake           | Sacrificial templates      | 0.2 M Na <sub>2</sub> SO <sub>4</sub>                         | 7.0  | 0.09                                | nr                         | 10.8                       | 15.8                       | nr                                 | 45 (6 h)                                                       | R3        |
| CuWO <sub>4</sub> with oxygen vacancy | Sacrificial templates      | 0.2 M Na <sub>2</sub> SO <sub>4</sub>                         | 7.0  | 0.2                                 | nr                         | 11.2                       | 26.2                       | nr                                 | 60 (6 h)                                                       | R3        |
| CuWO <sub>4</sub>                     | Ultrasonic spray pyrolysis | 0.2 M Na <sub>2</sub> SO <sub>4</sub>                         | 6.4  | 0.033                               | nr                         | nr                         | nr                         | nr                                 | 96 (2100 s)                                                    | R4        |
| CuWO <sub>4</sub> on carbon nanotube  | Spray pyrolysis            | 0.25 M (NaHCO <sub>3</sub> /Na <sub>2</sub> CO <sub>3</sub> ) | 10.0 | 0.23                                | 7 <sup>d)</sup>            | nr                         | nr                         | nr                                 | 85 (24 h) <sup>d)</sup>                                        | R5        |
| CuWO <sub>4</sub>                     | Spray pyrolysis            | 0.1 M KPi                                                     | 7.0  | 0.13                                | < 1                        | 2.5                        | 25                         | nr                                 | nr                                                             | R6        |
| CuWO <sub>4</sub>                     | Spray pyrolysis            | 0.1 M KBi                                                     | 7.0  | 0.08                                | nr                         | nr                         | nr                         | nr                                 | nr                                                             | R7        |
| CuWO <sub>4</sub>                     | Spin-coating               | 0.5 M KBi with 0.2M KCl                                       | 7.0  | 0.1                                 | nr                         | nr                         | nr                         | nr                                 | nr                                                             | R8        |
| CuWO <sub>4</sub>                     | Spin-coating               | 0.1 M KPi                                                     | 7.0  | 0.15                                | nr                         | nr                         | nr                         | 100                                | 15 (12 h)                                                      | R9        |
| CuWO <sub>4</sub>                     | Spin-coating               | 0.1 M KBi                                                     | 7.0  | 0.10                                | nr                         | nr                         | nr                         | 96                                 | 93 (12 h)                                                      | R9        |
| CuWO <sub>4</sub>                     | Spin-coating               | 0.1 M Na <sub>2</sub> SO <sub>4</sub>                         | 6.8  | 0.267                               | 2                          | nr                         | nr                         | nr                                 | nr                                                             | R10       |
| Nodular CuWO <sub>4</sub>             | Electrochemical deposition | 0.1 M KPi                                                     | 7.0  | 0.072                               | 21 <sup>e)</sup>           | nr                         | nr                         | > 90                               | nr                                                             | R11       |

|                                                  |                            |                                       |      |       |      |      |      |    |                          |     |
|--------------------------------------------------|----------------------------|---------------------------------------|------|-------|------|------|------|----|--------------------------|-----|
| CuWO <sub>4</sub>                                | Electrochemical deposition | 0.1 M KPi                             | 7.0  | 0.026 | 0.2  | nr   | nr   | nr | 81 (150 s)               | R12 |
| CuWO <sub>4</sub> nanoparticle                   | Spray pyrolysis            | 0.1 M KPi                             | 7.0  | 0.03  | 2    | nr   | nr   | nr | 50 (4000 s)              | R13 |
| CuWO <sub>4</sub>                                | Spray pyrolysis            | 0.3 M KBi                             | 7.5  | 0.027 | 0.03 | nr   | nr   | nr | nr                       | R14 |
| N <sub>2</sub> -treated CuWO <sub>4</sub>        | Electrochemical deposition | 0.1 M KPi                             | 7.0  | 0.08  | nr   | 4    | nr   | nr | nr                       | R15 |
| H <sub>2</sub> -treated CuWO <sub>4</sub>        | Hydrothermal               | 0.1 M Na <sub>2</sub> SO <sub>4</sub> | 6.8  | 0.2   | nr   | nr   | nr   | nr | 75 (1 h) <sup>e)</sup>   | R16 |
| CuWO <sub>4</sub> nanoparticle                   | Electrochemical deposition | 0.1 M KPi                             | 7.0  | 0.015 | 0.2  | 1.5  | 23   | nr | nr                       | R17 |
| Porous CuWO <sub>4</sub>                         | Electrochemical deposition | 0.1 M KPi                             | 7.0  | 0.2   | nr   | nr   | nr   | nr | ~80 (12 h) <sup>d)</sup> | R18 |
| CuWO <sub>4</sub> with a predominant (100) facet | Hydrothermal               | 0.2 M KPi                             | ~7   | 0.38  | 11   | 20.4 | 26.2 | 75 | 85 (6 h)                 | R19 |
| Polycrystalline CuWO <sub>4</sub>                | RF magnetron sputtering    | 0.33 M H <sub>3</sub> PO <sub>4</sub> | 1.35 | 0.126 | nr   | nr   | nr   | nr | nr                       | R20 |
| CuWO <sub>4</sub>                                | Spray pyrolysis            | 0.1 M KPi                             | 7.0  | 0.5   | nr   | nr   | nr   | nr | ~80 (10 h)               | R21 |

<sup>a)</sup> nr: not reported, measured at 1.23V vs. RHE with simulated solar light (AM 1.5, 100 mW cm<sup>-2</sup>), <sup>b)</sup> monoclinic light (LED, 420 nm, 3.78 mW cm<sup>-2</sup>), <sup>c)</sup> visible light (Xe lamp with L39 and heat-cut filter, 100 mW cm<sup>-2</sup>), <sup>d)</sup> at 1.63 V vs. RHE, <sup>e)</sup> at 1.6 V vs. RHE, <sup>f)</sup> at 1.1 V vs. RHE.

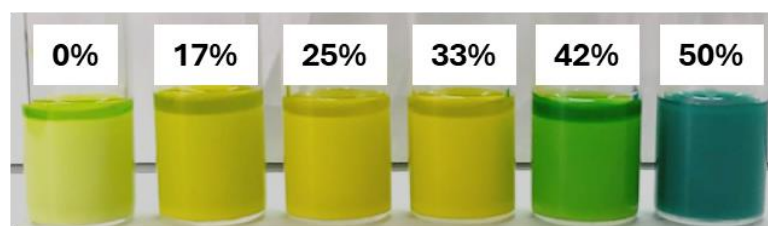

**Figure S1** Photos of precursor suspensions containing 0.42 M  $\text{Cu}(\text{NO}_3)_2$  and 0.50 M  $\text{WCl}_6$  with different fractions ( $F_{\text{im}} = 0 \sim 50\%$  vol) of BIm in methanol/BIm mixed solvents.  $F_{\text{im}}$  values are indicated on the figure.

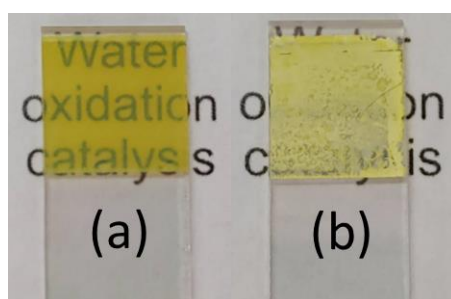

**Figure S2** Photos of  $\text{CuWO}_4$  films with  $F_{\text{im}}$  of (a) 33% and (b) 0% on an FTO substrate.

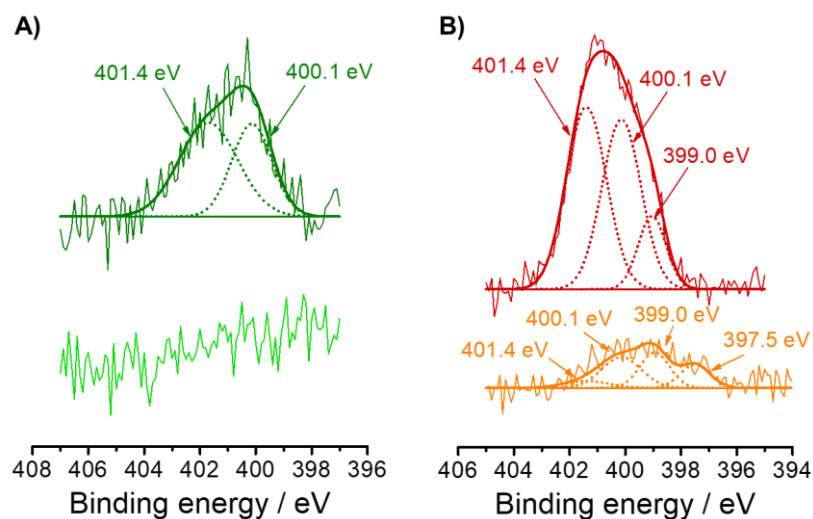

**Figure S3.** XPS spectra in the N1s region for  $\text{CuWO}_4$  films with  $F_{\text{im}}$  of (A) 0% and (B) 33% before (top) and after (bottom) a surface treatment with Ar plasma etching.

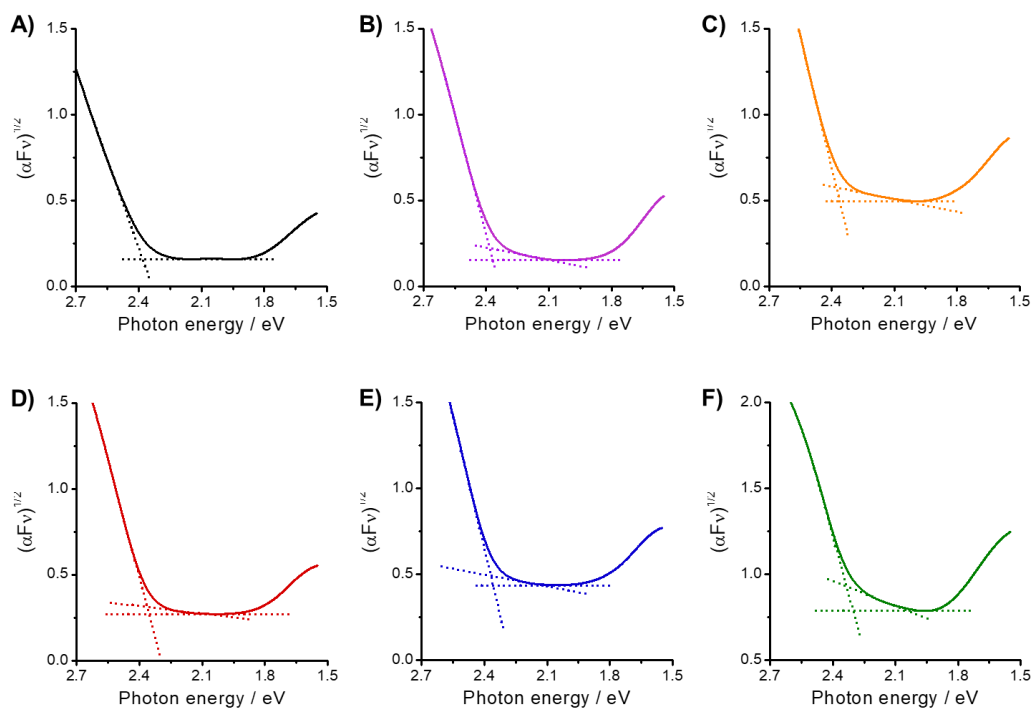

**Figure S4** Tauc plots based on the DRS spectra (Figure 4A) of  $\text{CuWO}_4$  films with  $F_{im}$  of (A) 0%, (B) 17%, (C) 25%, (D) 33%, (E) 42% and (F) 50%. The dotted lines represent slopes to calculate bandgap energies.

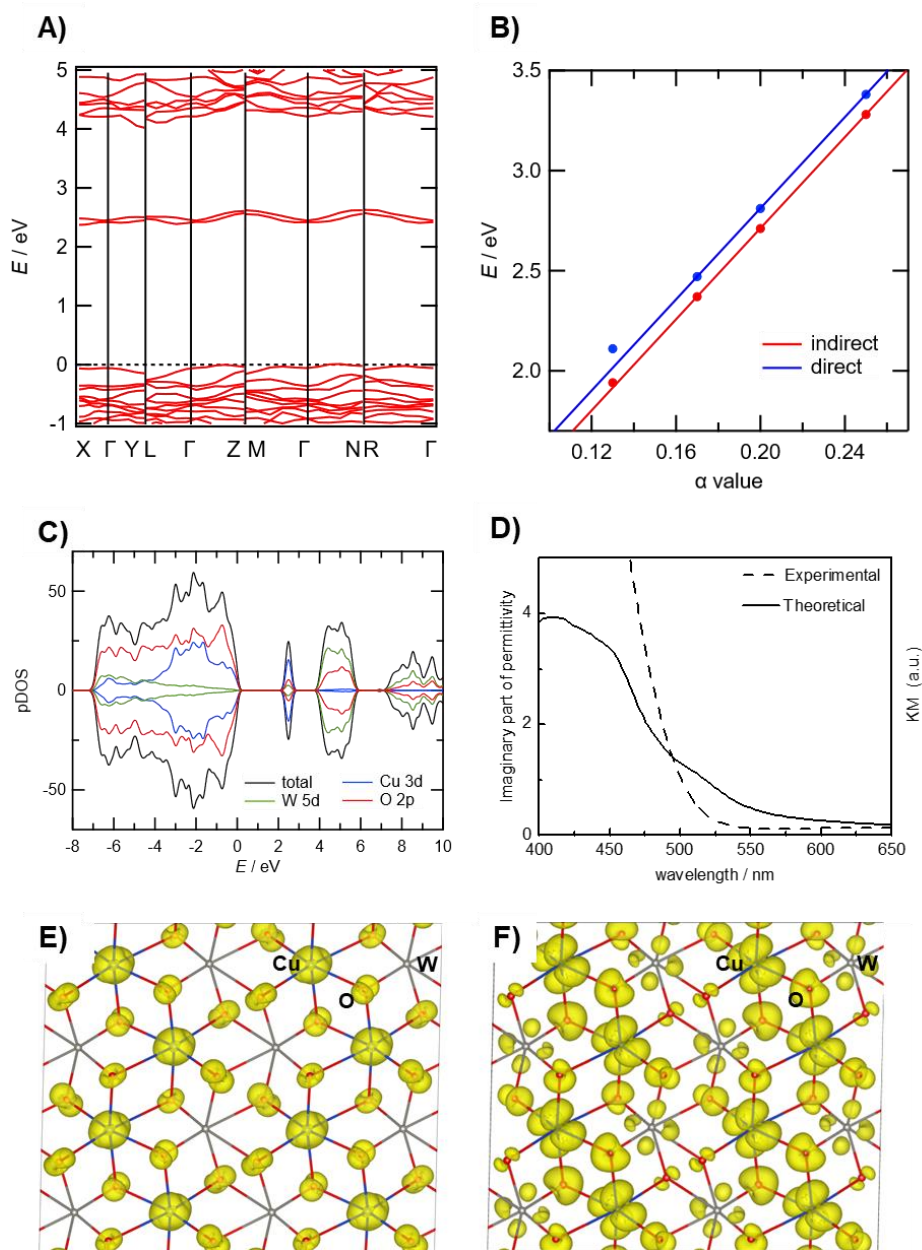

**Figure S5** (A) Band diagram calculated for neat  $\text{CuWO}_4$  crystals using HSE06 functional with the exact exchange mixing coefficient ( $\alpha$ ) of 0.17. (B) Plots of the calculated band gap versus  $\alpha$  values. (C) pDOS diagram (black) calculated for neat  $\text{CuWO}_4$  at  $\alpha = 0.17$ . Contributions from the Cu 3d (blue), O 2p (red) and W 5d (green) bands are indicated by different colors. (D) Imaginary part of the calculated dielectric coefficients (solid line) and the measured DRS spectrum for neat- $\text{CuWO}_4$  (dashed line). Integrated density of states (IDOS) of (E) the valence band (VB) top and (F) the conduction band (CB) bottom for neat  $\text{CuWO}_4$ . The atoms of Cu, O, and W are marked in figures.

**Table S2.** Parameters for calculation of replacement energies ( $E_{\text{rep}}(\Delta\epsilon_{\text{F}})$ ) of O1-O4 with  $\text{N}^{1-}$ ,  $\text{N}^{2-}$ , and  $\text{N}^{3-}$  for  $\text{CuWO}_4$ .

| dopant          | site | $q$ | $E_{\text{rep}}(0)$ |
|-----------------|------|-----|---------------------|
| $\text{N}^{1-}$ | O1   | +1  | 3.59                |
|                 | O2   | +1  | 3.83                |
|                 | O3   | +1  | 3.82                |
|                 | O4   | +1  | 3.69                |
| $\text{N}^{2-}$ | O1   | 0   | 4.26                |
|                 | O2   | 0   | 4.83                |
|                 | O3   | 0   | 4.67                |
|                 | O4   | 0   | 4.38                |
| $\text{N}^{3-}$ | O1   | -1  | 4.93                |
|                 | O2   | -1  | 5.35                |
|                 | O3   | -1  | 5.05                |
|                 | O4   | -1  | 5.18                |

**Table S3.** Summary of energy levels of VB top and CB bottom, impurity bands, and transition energies estimated from the PDOS diagrams. <sup>a</sup>

| Dopant          | Site | Spin  | $E_{VB}$ /<br>eV | $E_{N-d}$ /<br>eV | $E_{N-a}$ /<br>eV | $E_{CB}$ /<br>eV   | Transition energy / eV<br>(Assignment) |                  |
|-----------------|------|-------|------------------|-------------------|-------------------|--------------------|----------------------------------------|------------------|
| Neat            |      | up    | -0.42            |                   |                   | 1.95               | 2.37 (VB → CB)                         |                  |
|                 |      | down  | -0.42            |                   |                   | 1.95               | 2.37 (VB → CB)                         |                  |
| N <sup>1-</sup> | O1   | up    | 0.00             |                   |                   | 2.25               | 2.25 (VB → CB)                         |                  |
|                 |      |       | 0.00             |                   | 1.32              |                    | 1.32 (VB → N-a1)                       |                  |
|                 |      | down  | 0.00             |                   |                   | 2.33               | 2.33 (VB → CB)                         |                  |
|                 |      |       | 0.00             |                   | 2.14              |                    | 2.14 (VB → N-a2)                       |                  |
|                 | O2   | up    | 0.00             |                   |                   | 2.23               | 2.23 (VB → CB)                         |                  |
|                 |      |       | 0.00             |                   |                   | 2.31               | 2.31 (VB → CB)                         |                  |
|                 |      | down  | 0.00             |                   | 1.97              |                    | 1.97 (VB → N-a1)                       |                  |
|                 |      |       | 0.00             |                   | 1.67              |                    | 1.67 (VB → N-a2)                       |                  |
|                 | O3   | up    | -0.14            |                   |                   | 2.10               | 2.24 (VB → CB)                         |                  |
|                 |      |       |                  |                   | -0.03             |                    | 2.10                                   | 2.13 (N-d1 → CB) |
|                 |      | down  | -0.09            |                   |                   | 2.22               | 2.19 (VB → CB)                         |                  |
|                 |      |       | -0.09            |                   | 1.71              |                    | 1.80 (VB → N-a1)                       |                  |
| O4              | up   | 0.00  |                  |                   | 2.34              | 2.34 (VB → CB)     |                                        |                  |
|                 |      | 0.00  |                  | 2.21              |                   | 2.21 (VB → N-a1)   |                                        |                  |
|                 | down | 0.00  |                  | 1.41              |                   | 1.41 (VB → N-a2)   |                                        |                  |
|                 |      | 0.00  |                  |                   | 2.32              | 2.32 (VB → CB)     |                                        |                  |
| N <sup>2-</sup> | O1   | up    | -0.29            |                   |                   | 2.00               | 2.30 (VB → CB)                         |                  |
|                 |      |       |                  |                   | -0.01             |                    | 2.02                                   | 2.02 (N-d1 → CB) |
|                 |      | down  | -0.33            |                   |                   | 2.02               | 2.36 (VB → CB)                         |                  |
|                 |      |       |                  |                   | -0.21             |                    | 2.02                                   | 2.24 (N-d1 → CB) |
|                 | O2   | up    | -0.33            |                   |                   | 1.86               | 2.19 (VB → N-a1)                       |                  |
|                 |      |       |                  |                   |                   |                    |                                        |                  |
|                 |      | down  | -0.57            |                   |                   | 1.71               | 2.28 (VB → CB)                         |                  |
|                 |      |       |                  |                   | -0.45             |                    | 1.71                                   | 2.16 (N-d1 → CB) |
|                 | O3   | up    | -0.57            |                   |                   | 1.68               | 2.25 (VB → CB)                         |                  |
|                 |      |       |                  |                   | 1.38              |                    | 1.95 (VB → N-a1)                       |                  |
|                 |      | down  | -0.57            |                   | -0.10             |                    | 1.68                                   | 1.78 (N-d1 → CB) |
|                 |      |       |                  |                   | 0.00              |                    | 1.68                                   | 1.68 (N-d2 → CB) |
| O4              | up   | -0.10 |                  |                   | 1.38              | 1.48 (N-d1 → N-a1) |                                        |                  |
|                 |      |       |                  | 0.00              | 1.38              |                    | 1.38 (N-d2 → N-a2)                     |                  |
|                 | down | -0.42 |                  |                   | 1.85              | 2.27 (VB → CB)     |                                        |                  |
|                 |      |       |                  | -0.28             |                   | 1.85               | 2.16 (N-d1 → CB)                       |                  |
| O5              | up   | -0.44 |                  |                   | 1.85              | 2.29 (VB → CB)     |                                        |                  |
|                 |      |       |                  | -0.01             |                   | 1.85               | 1.86 (N-d1 → CB)                       |                  |
|                 | down | -0.44 |                  | 1.19              |                   | 1.63 (VB → N-a1)   |                                        |                  |
|                 |      |       |                  | -0.01             | 1.19              |                    | 1.20 (N-d1 → N-a1)                     |                  |
| O6              | up   | -0.20 |                  |                   | 2.12              | 2.32 (VB → CB)     |                                        |                  |
|                 | down | -0.15 |                  | -0.02             | 2.12              | 2.14 (N-d1 → CB)   |                                        |                  |
|                 |      |       |                  |                   | 2.10              | 2.25 (VB → CB)     |                                        |                  |



**Table S3. (continued)**

| Dopant          | Site | Spin  | $E_{VB}$ | $E_{N-d}$ | $E_{N-a}$ | $E_{CB}$ | Transition energy<br>(assignment) |                  |                  |
|-----------------|------|-------|----------|-----------|-----------|----------|-----------------------------------|------------------|------------------|
| N <sup>3-</sup> | O1   | up    | -0.59    |           |           | 1.73     | 2.32 (VB → CB)                    |                  |                  |
|                 |      |       |          |           | -0.43     |          | 1.73                              | 2.16 (N-d1 → CB) |                  |
|                 |      |       |          |           | -0.20     |          | 1.73                              | 1.93 (N-d2 → CB) |                  |
|                 |      | down  |          |           | -0.09     |          | 1.73                              | 1.82 (N-d3 → CB) |                  |
|                 |      |       |          |           |           | -0.59    |                                   | 1.73             | 2.32 (VB → CB)   |
|                 |      |       |          |           |           | -0.44    |                                   | 1.73             | 2.17 (N-d1 → CB) |
|                 | O2   | up    | -0.53    |           |           |          | 1.73                              | 1.74 (N-d2 → CB) |                  |
|                 |      |       |          |           | -0.31     |          | 1.79                              | 2.32 (VB → CB)   |                  |
|                 |      |       |          |           | -0.14     |          | 1.79                              | 2.10 (N-d1 → CB) |                  |
|                 |      | down  |          |           | -0.50     |          | 1.74                              | 1.93 (N-d2 → CB) |                  |
|                 |      |       |          |           |           | -0.18    |                                   | 1.74             | 2.24 (VB → CB)   |
|                 |      |       |          |           |           | -0.08    |                                   | 1.74             | 1.92 (N-d1 → CB) |
| O3              | up   | -0.58 |          |           |           | 1.74     | 1.82 (N-d2 → CB)                  |                  |                  |
|                 |      |       |          | -0.40     |           | 1.74     | 1.75 (N-d3 → CB)                  |                  |                  |
|                 |      |       |          | -0.31     |           | 1.74     | 2.33 (VB → CB)                    |                  |                  |
|                 | down |       |          | -0.53     |           | 1.74     | 2.05 (N-d2 → CB)                  |                  |                  |
|                 |      |       |          |           | -0.19     |          | 1.74                              | 1.93 (N-d3 → CB) |                  |
|                 |      |       |          |           | -0.18     |          | 1.74                              | 2.28 (VB → CB)   |                  |
| O4              | up   | -0.52 |          |           |           | 1.74     | 1.92 (N-d1 → CB)                  |                  |                  |
|                 |      |       |          | -0.32     |           | 1.74     | 1.75 (N-d2 → CB)                  |                  |                  |
|                 |      |       |          | -0.09     |           | 1.74     | 2.05 (N-d1 → CB)                  |                  |                  |
|                 | down |       |          | -0.50     |           | 1.73     | 1.83 (N-d2 → CB)                  |                  |                  |
|                 |      |       |          |           | -0.01     |          | 1.73                              | 2.24 (VB → CB)   |                  |
|                 |      |       |          |           |           | 1.73     | 1.73 (N-d1 → CB)                  |                  |                  |

<sup>a)</sup>  $E_{VB}$ ,  $E_{VB}$ ,  $E_{N-d}$  and  $E_{N-a}$  are energy levels of VB top, CB bottom, donor and acceptor impurity bands due to N 2p orbitals, respectively.

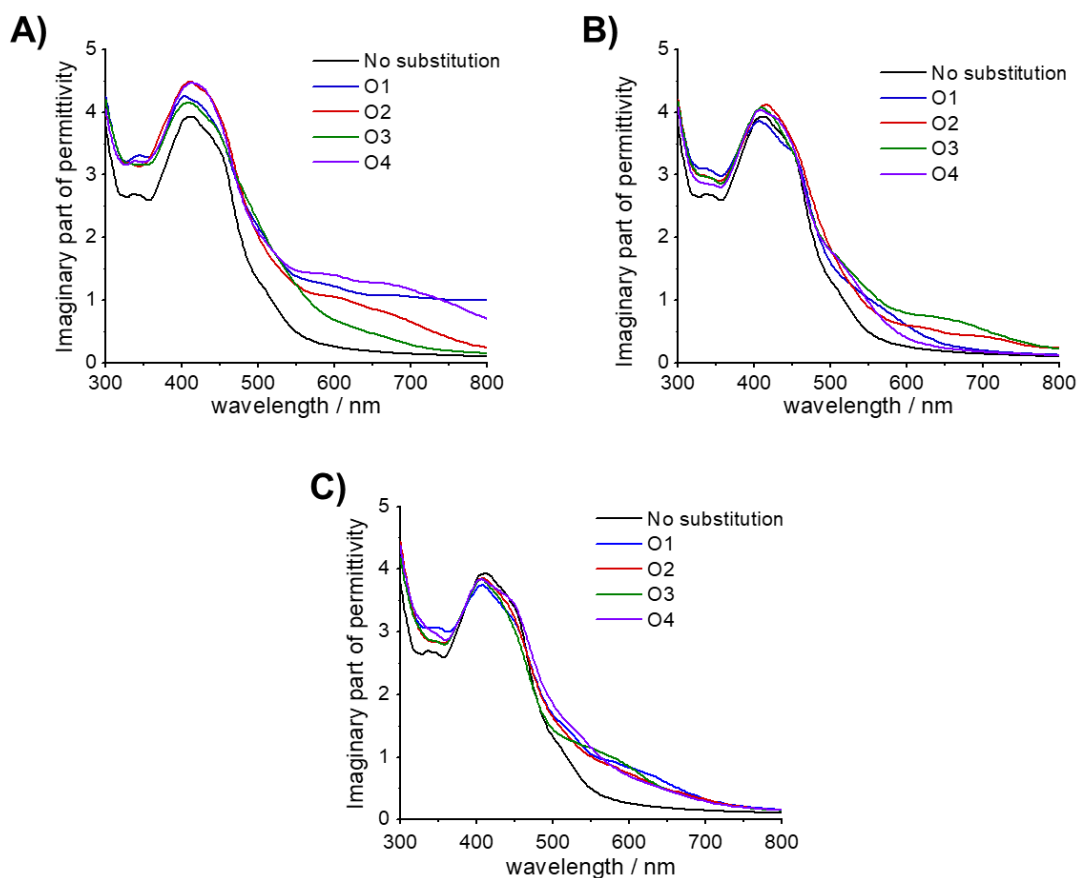

**Figure S6.** Imaginary part of the calculated dielectric coefficients for neat-CuWO<sub>4</sub> (black) and N-CuWO<sub>4</sub> with substitutions of O1-O4 with (A) N<sup>1-</sup>, (B) N<sup>2-</sup>, and (C) N<sup>3-</sup>. The replaced O atoms in O1-O4 are indicated by different colors in each figure.

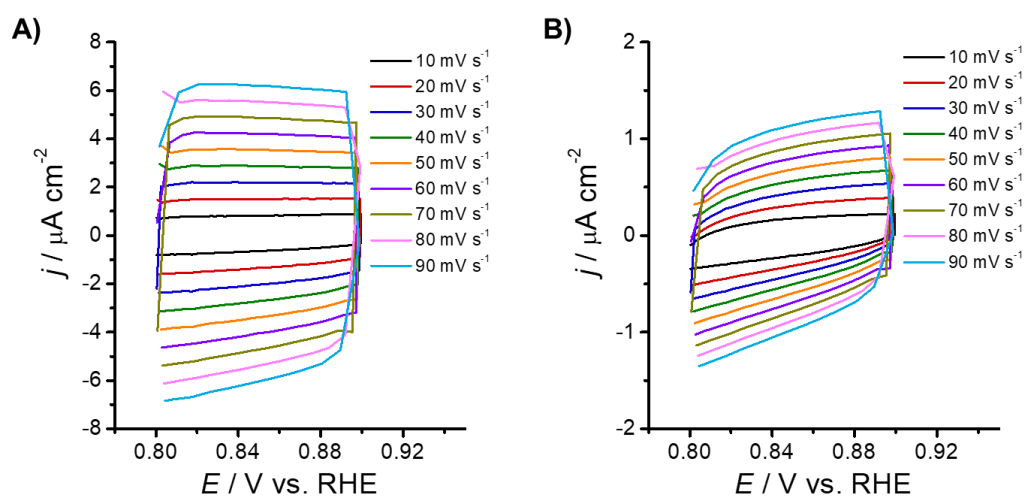

**Figure S7** CVs of (A) N-CuWO<sub>4</sub> ( $F_{\text{im}} = 33\%$ ) and (B) neat-CuWO<sub>4</sub> electrodes as measured in 0.1 M KPi solutions (pH = 7) in the potential range of 0.8 – 0.9 V vs. RHE at different scan rates of 10 – 90 mV s<sup>-1</sup> under dark conditions.

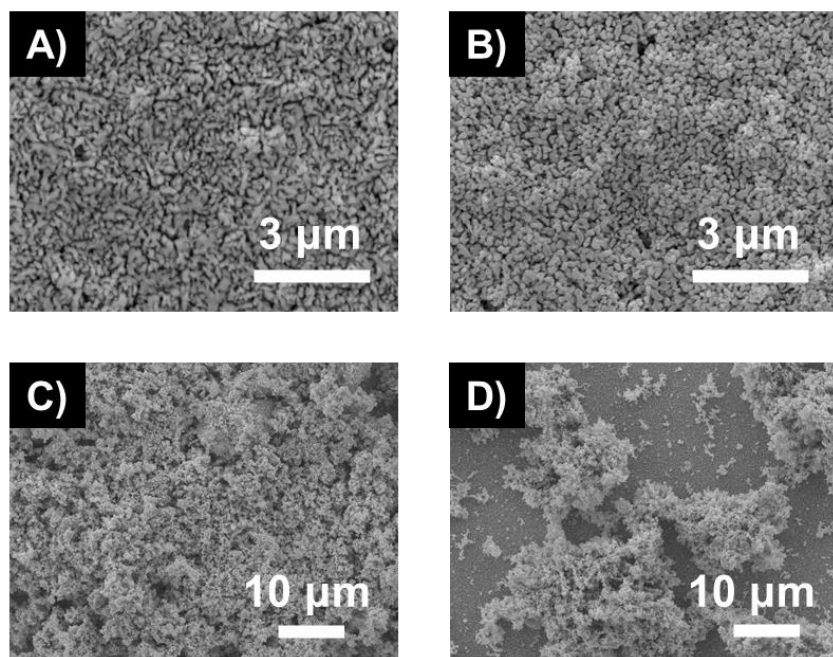

**Figure S8** Top view SEM images of (A and B) N-CuWO<sub>4</sub> ( $F_{im} = 33\%$ ) and (C and D) neat-CuWO<sub>4</sub> electrode (A and C) before and (B and D) after 15 h photoelectrolysis in a 0.1 M KPi buffer (pH 7.0) at 1.23 V under the light irradiation (>390 nm, 100 mW cm<sup>-2</sup>).

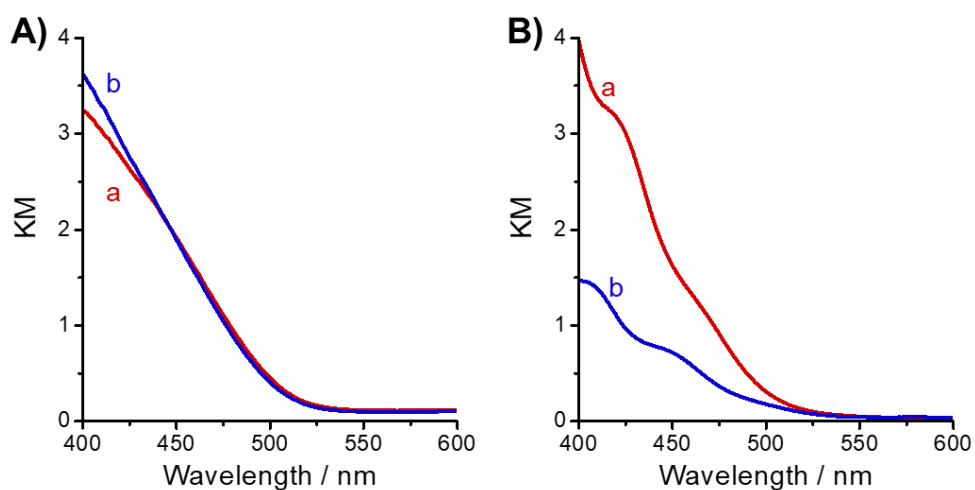

**Figure S9** DRS of (A) N-CuWO<sub>4</sub> ( $F_{im} = 33\%$ ) and (B) neat-CuWO<sub>4</sub> electrodes before (a, red) and after 15 h photoelectrolysis (b, blue) in a 0.1 M KPi buffer (pH 7.0) at 1.23 V under the light irradiation (>390 nm, 100 mW cm<sup>-2</sup>).

## Reference

- R1 W. Ye, F. Chen, F. Zhao, N. Han and Y. Li, *ACS Appl. Mater. Interfaces*, 2016, **8**, 9211–9217.
- R2 D. Hu, P. Diao, D. Xu, M. Xia, Y. Gu, Q. Wu, C. Li and S. Yang, *Nanoscale*, 2016, **8**, 5892–5901.
- R3 W. Guo, Y. Wang, X. Lian, Y. Nie, S. Tian, S. Wang, Y. Zhou and G. Henkelman, *Catal. Sci. Technol.*, 2020, **10**, 7344–7351.
- R4 X. Duan, C. Xu, A. M. El Nahrawy, J. Chen, Z. Zhu, J. Wang, Q. Liang and F. Cao, *ChemNanoMat*, 2022, **8**.
- R5 N. Gaillard, Y. Chang, A. Deangelis, S. Higgins and A. Braun, *Int. J. Hydrogen Energy*, 2013, **38**, 3166–3176.
- R6 D. Bohra and W. A. Smith, *Phys. Chem. Chem. Phys.*, 2015, **17**, 9857–9866.
- R7 C. R. Lhermitte and B. M. Bartlett, *Acc. Chem. Res.*, 2016, **49**, 1121–1129.
- R8 K. J. Pyper, J. E. Yourey and B. M. Bartlett, *J. Phys. Chem. C*, 2013, **117**, 24726–24732.
- R9 J. E. Yourey, K. J. Pyper, J. B. Kurtz and B. M. Bartlett, *J. Phys. Chem. C*, 2013, **117**, 8708–8718.
- R10 Y. Sun, F. Du, D. Xie, D. Yang, Y. Jiao, L. Jia and H. Fan, *Chin. Phys. B*, 2020, **29**, 127801.
- R11 J. C. Hill, Y. Ping, G. A. Galli and K. S. Choi, *Energy Environ. Sci.*, 2013, **6**, 2440–2446.
- R12 M. Davi, M. Mann, Z. Ma, F. Schrader, A. Drichel, S. Budnyk, A. Rokicinska, P. Kustrowski, R. Dronskowski and A. Slabon, *Langmuir*, 2018, **34**, 3845–3852.
- R13 M. Valenti, D. Dolat, G. Biskos, A. Schmidt-Ott and W. A. Smith, *J. Phys. Chem. C*, 2015, **119**, 2096–2104.

- R14 A. Venugopal and W. A. Smith, *Faraday Discuss.*, 2019, **215**, 175–191.
- R15 Z. Ma, O. Linnenberg, A. Rokicinska, P. Kustrowski and A. Slabon, *J. Phys. Chem. C*, 2018, **122**, 19281–19288.
- R16 Y. Tang, N. Rong, F. Liu, M. Chu, H. Dong, Y. Zhang and P. Xiao, *Appl. Surf. Sci.*, 2016, **361**, 133–140.
- R17 M. Davi, A. Drichel, M. Mann, T. Scholz, F. Schrader, A. Rokicinska, P. Kustrowski, R. Dronskowski and A. Slabon, *J. Phys. Chem. C*, 2017, **121**, 26265–26274.
- R18 J. E. Yourey and B. M. Bartlett, *J. Mater. Chem.*, 2011, **21**, 7651.
- R19 L. Chen, W. Li, W. Qiu, G. He, K. Wang, Y. Liu, Q. Wu and J. Li, *ACS Appl. Mater. Interfaces*, 2022, **14**, 47737–47746.
- R20 Y. Chang, A. Braun, A. Deangelis, J. Kaneshiro and N. Gaillard, *J. Phys. Chem. C*, 2011, **115**, 25490–25495.
- R21 C. M. Tian, M. Jiang, D. Tang, L. Qiao, H. Y. Xiao, F. E. Oropeza, J. P. Hofmann, E. J. M. Hensen, A. Tadich, W. Li, D. C. Qi and K. H. L. Zhang, *J. Mater. Chem. A*, 2019, **7**, 11895–11907.
